# Supplementary material for: Apolipoprotein E imbalance in the cerebrospinal fluid of Alzheimer’s disease patients
Source: Springer Nature journal article supplement (doi:10.1186/s13195-022-01108-2), 2022-11-02
Supplement: MOESM1 [file 23667512]

**Figure 1A. ApoE in rat CSF**

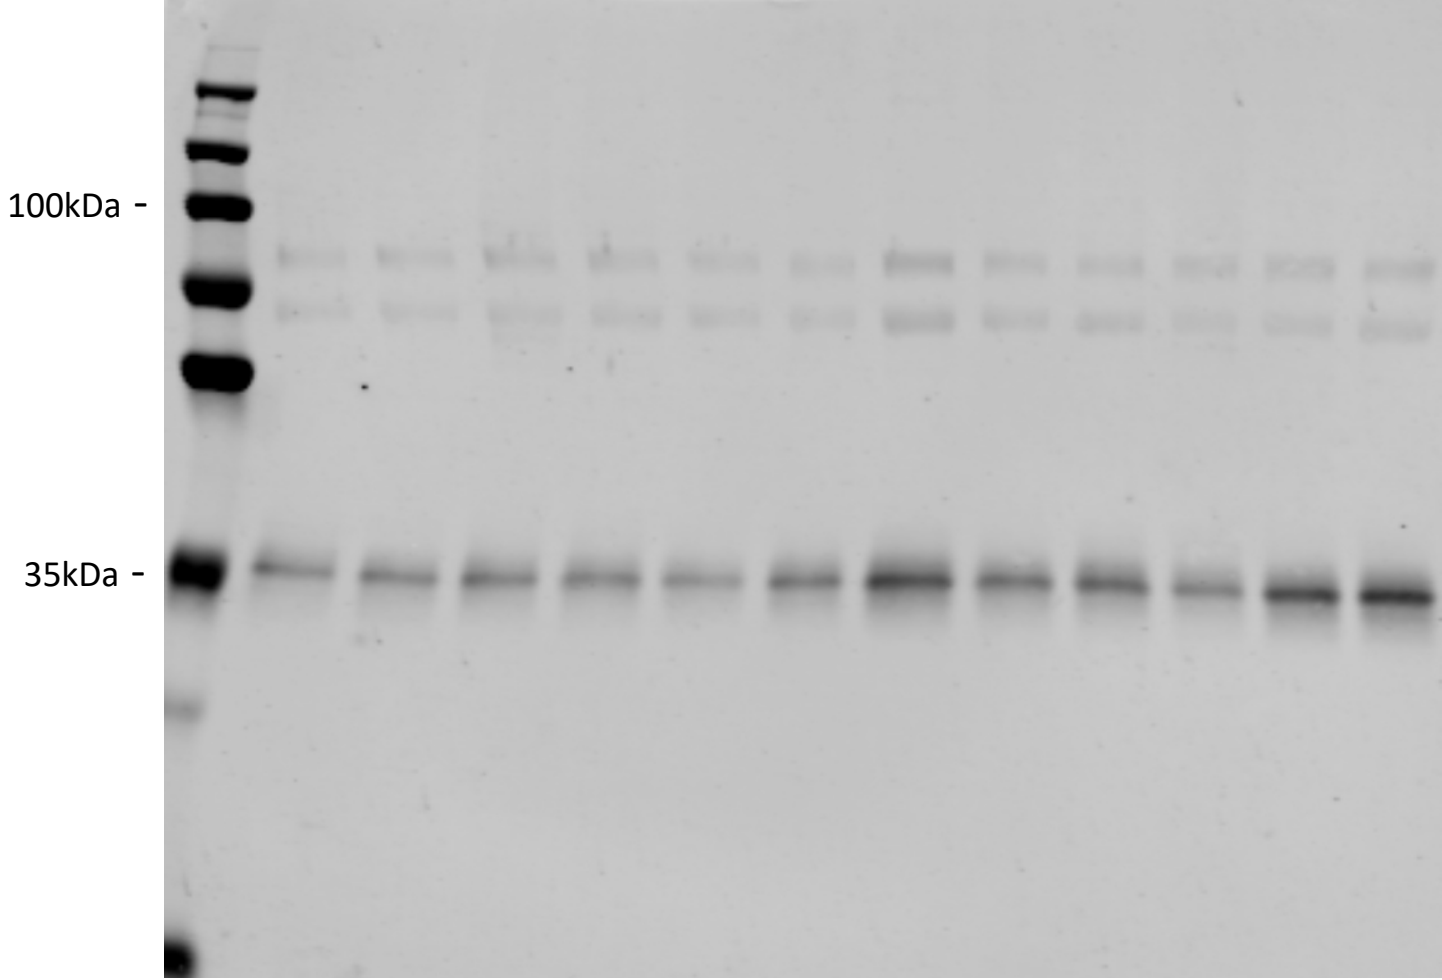

**Figure 2A. ApoE in human CSF**

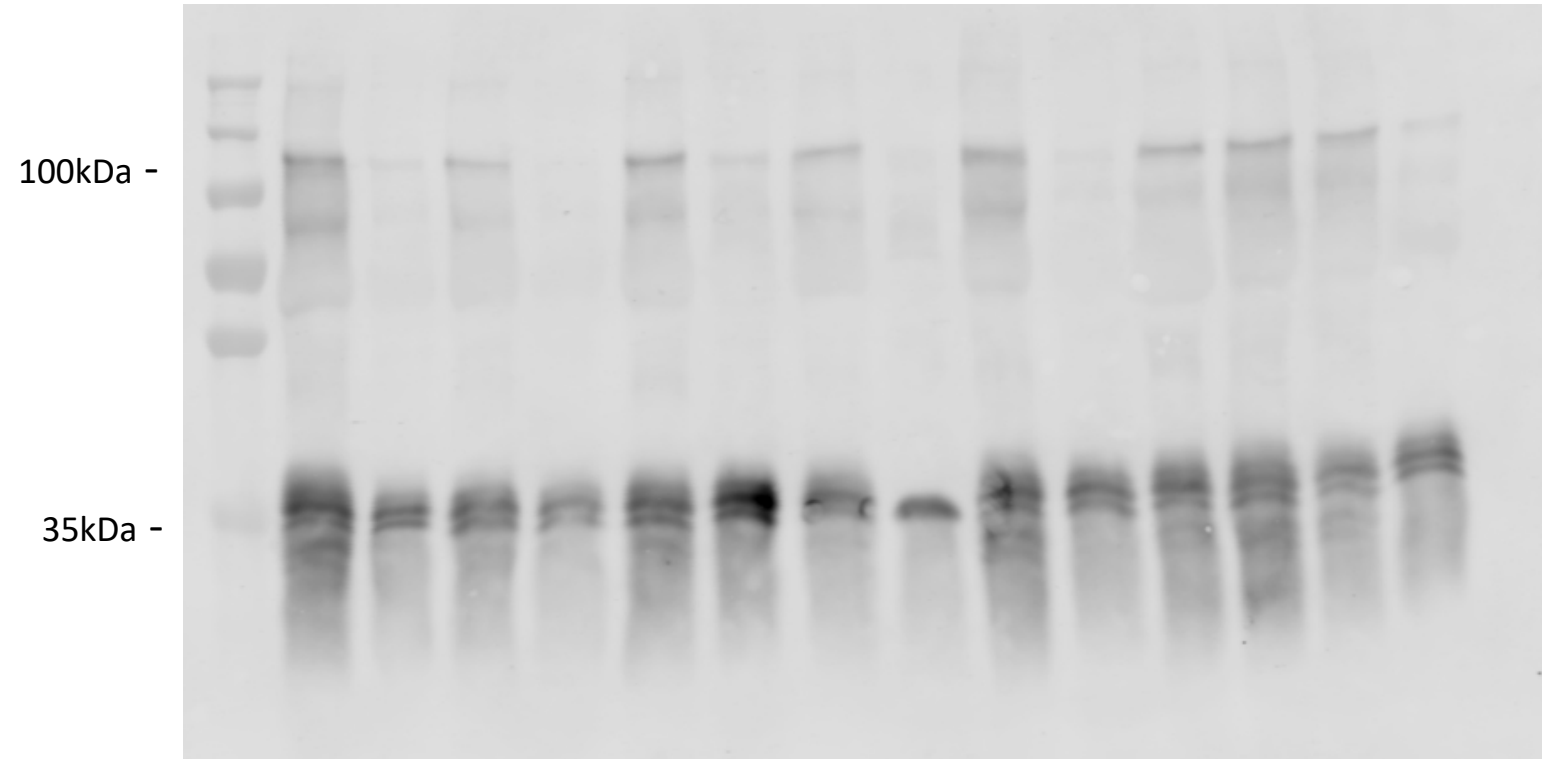

Lanes 3, 4, 11, 14 and 15

**Figure 2B. ApoE immunoprecipitation in human CSF**

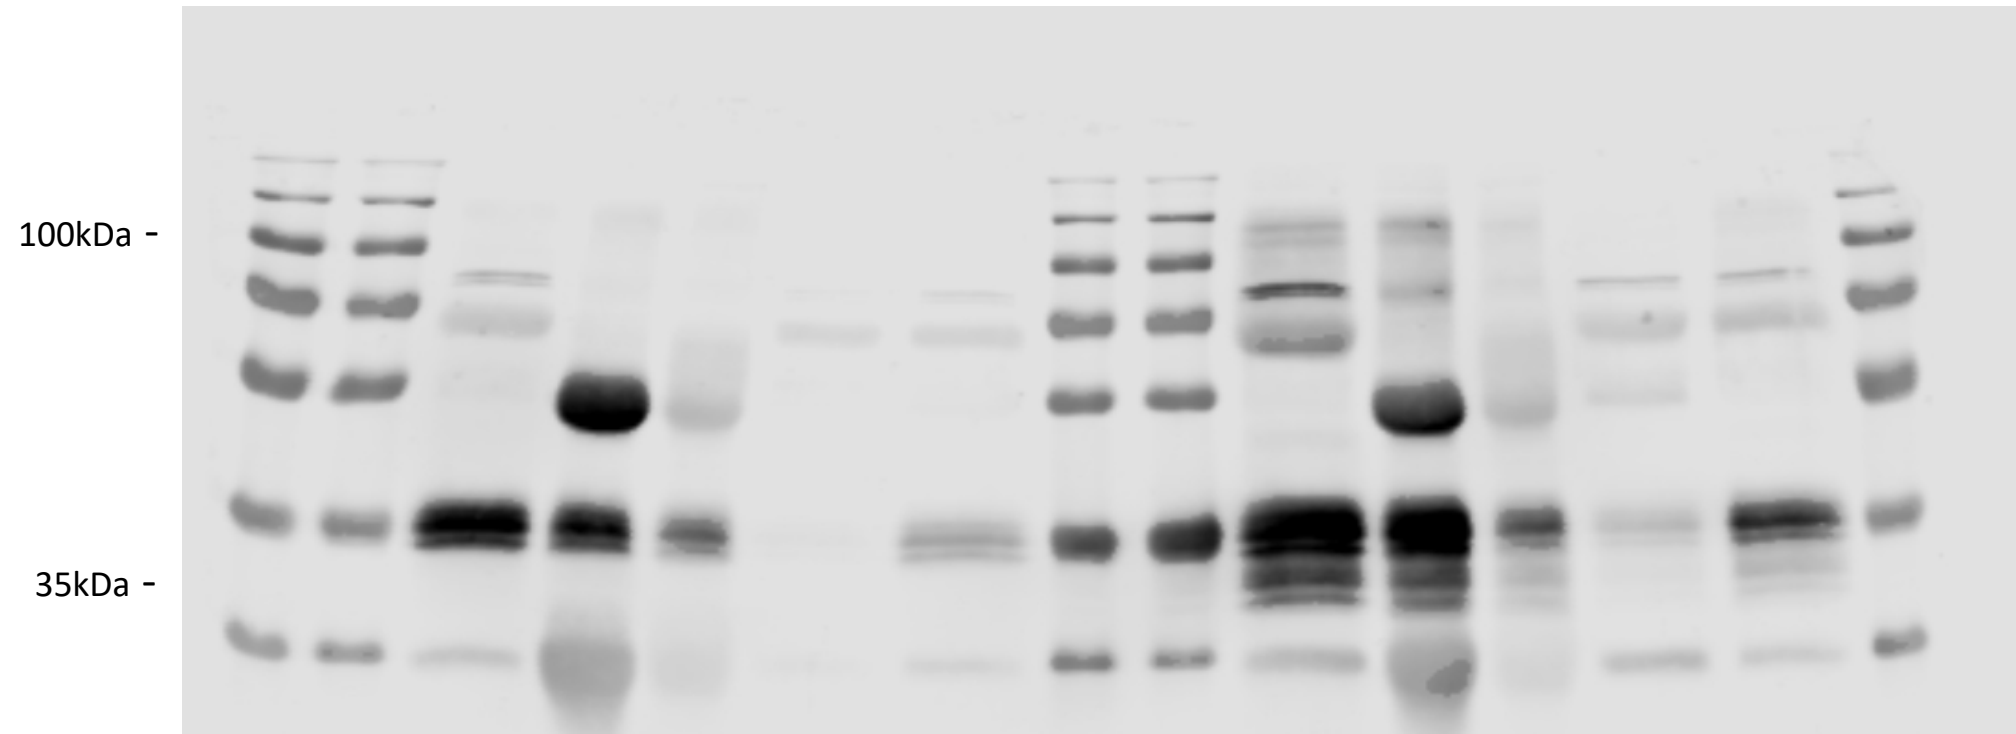

Lanes 3, 4, 6, 10, 11 and 13 used

**Figure 2C. ApoE deglycosylation in human CSF**

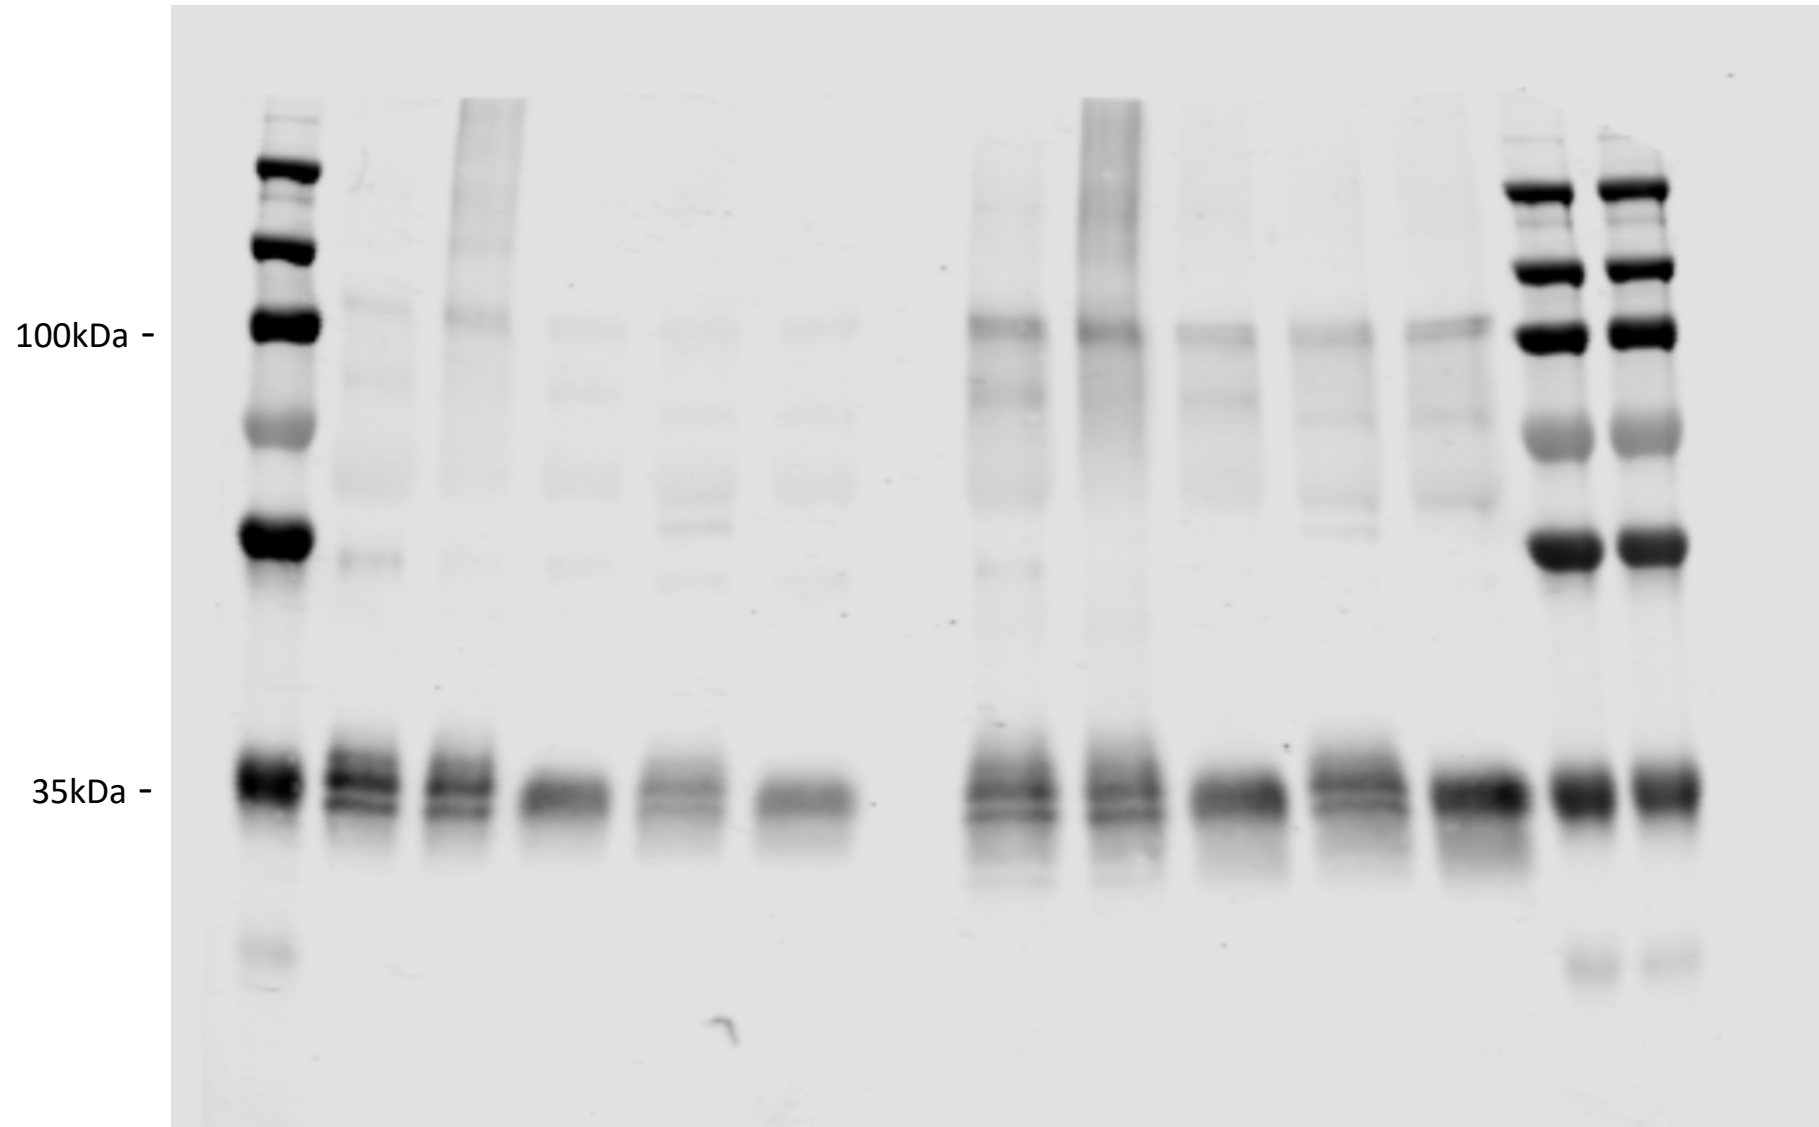

**Figure 3A. ApoE under reducing and non-reducing conditions using standard anti-apoE antibody in human CSF**

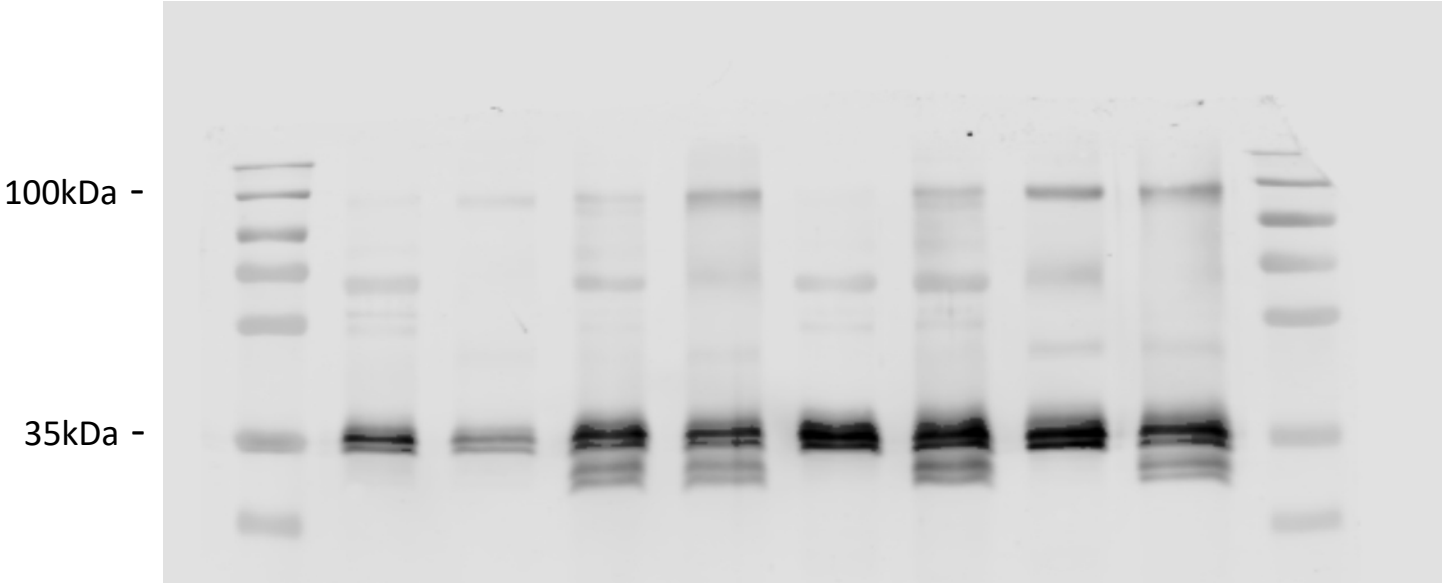

Lanes 5-8 used

**Figure 3B. ApoE under reducing and non-reducing conditions using anti-apoE4 antibody in human CSF**

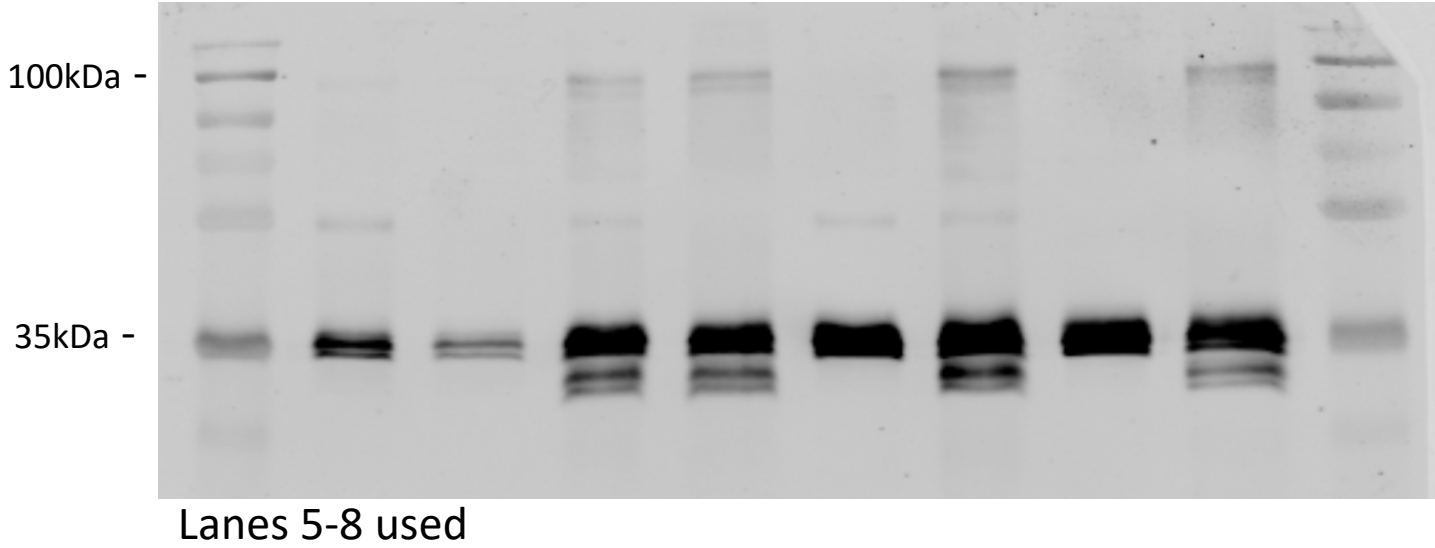

### Figure 3C. ApoE under native conditions in human CSF

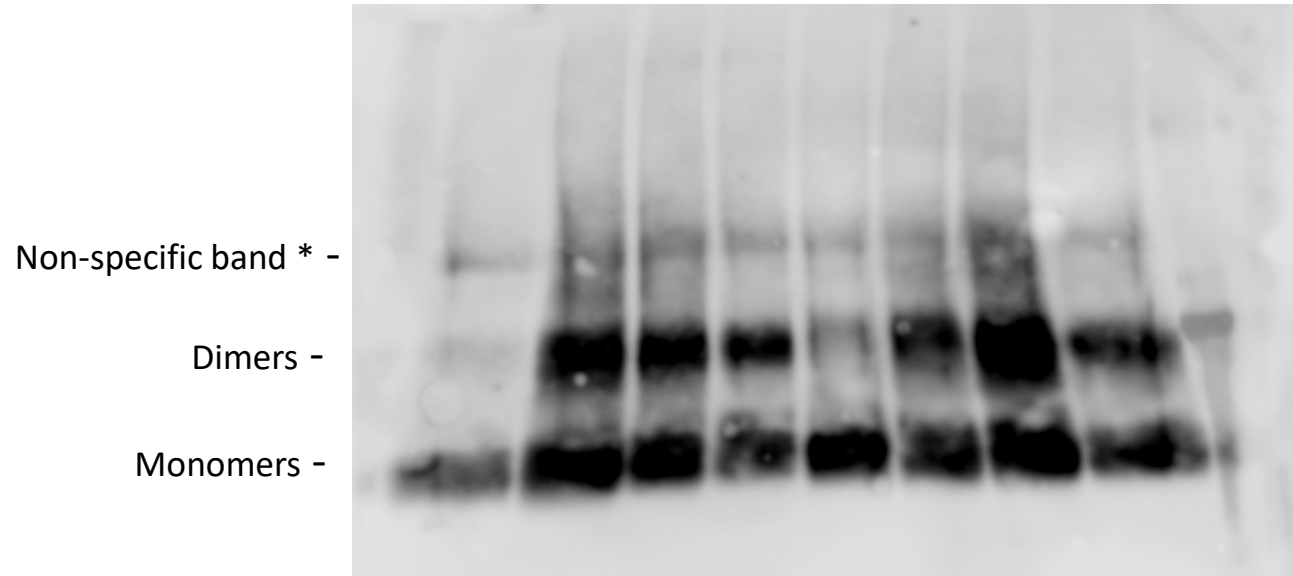

Lanes 3, 4 and 5 used

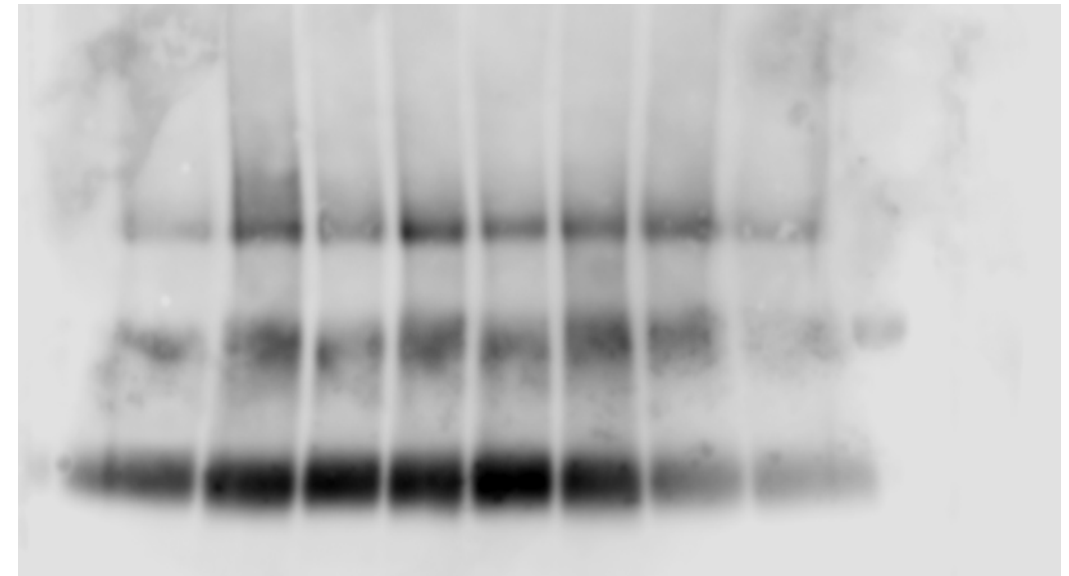

Lanes 5 and 6 used

**Figure 4A. Representative blot of apoE in human CSF from the Gothenburg cohort**

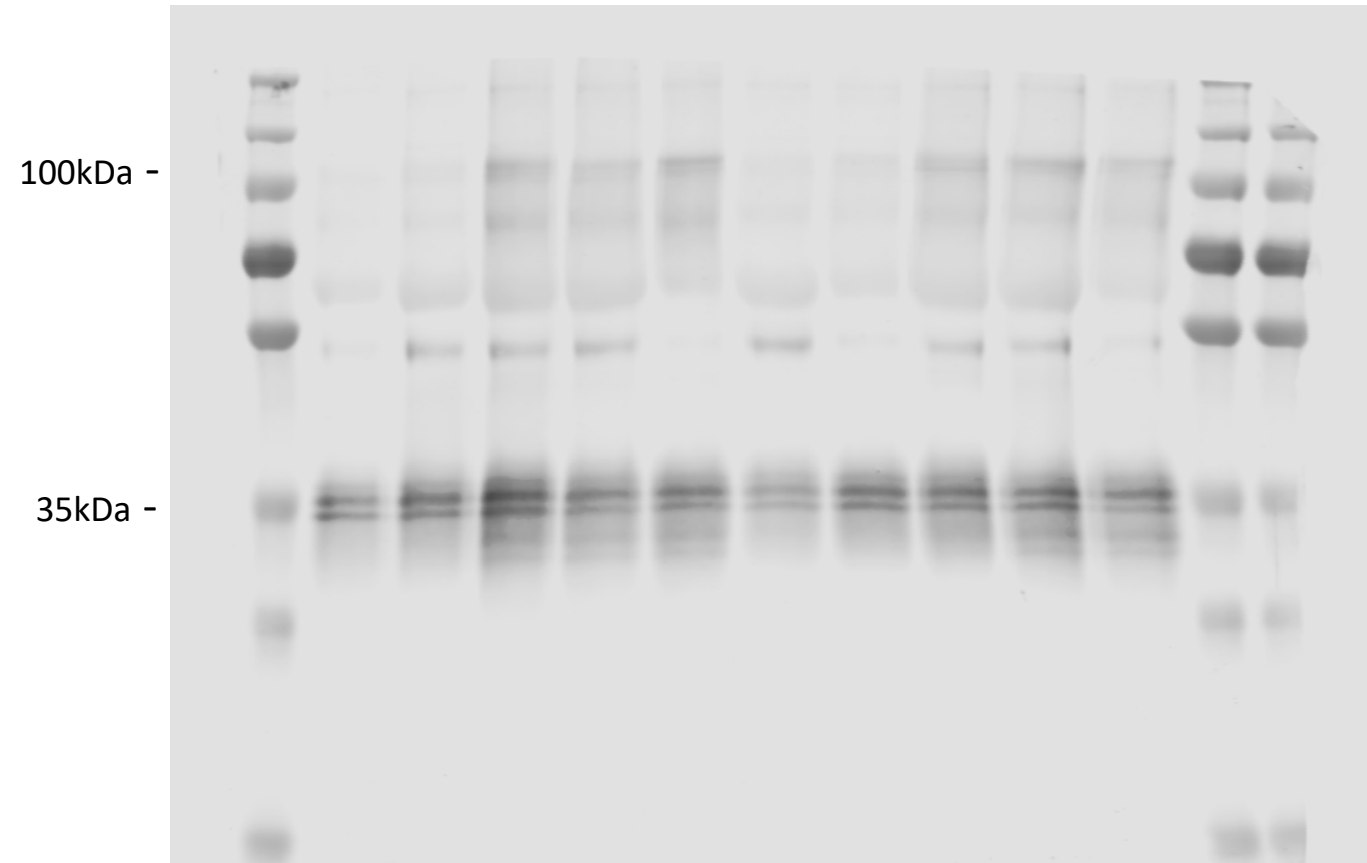

Lanes 2, 3, 4, 5 and 6 used

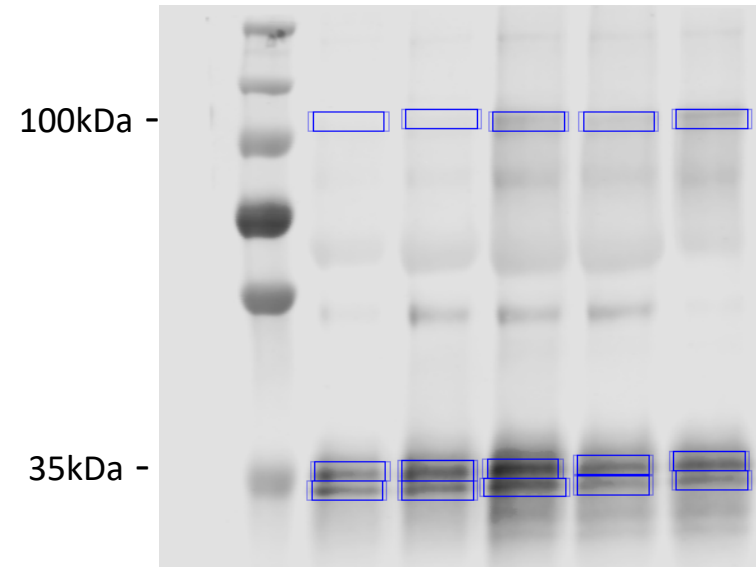



**Figure 5A. Representative blot of apoE in human CSF from the Barcelona cohort**

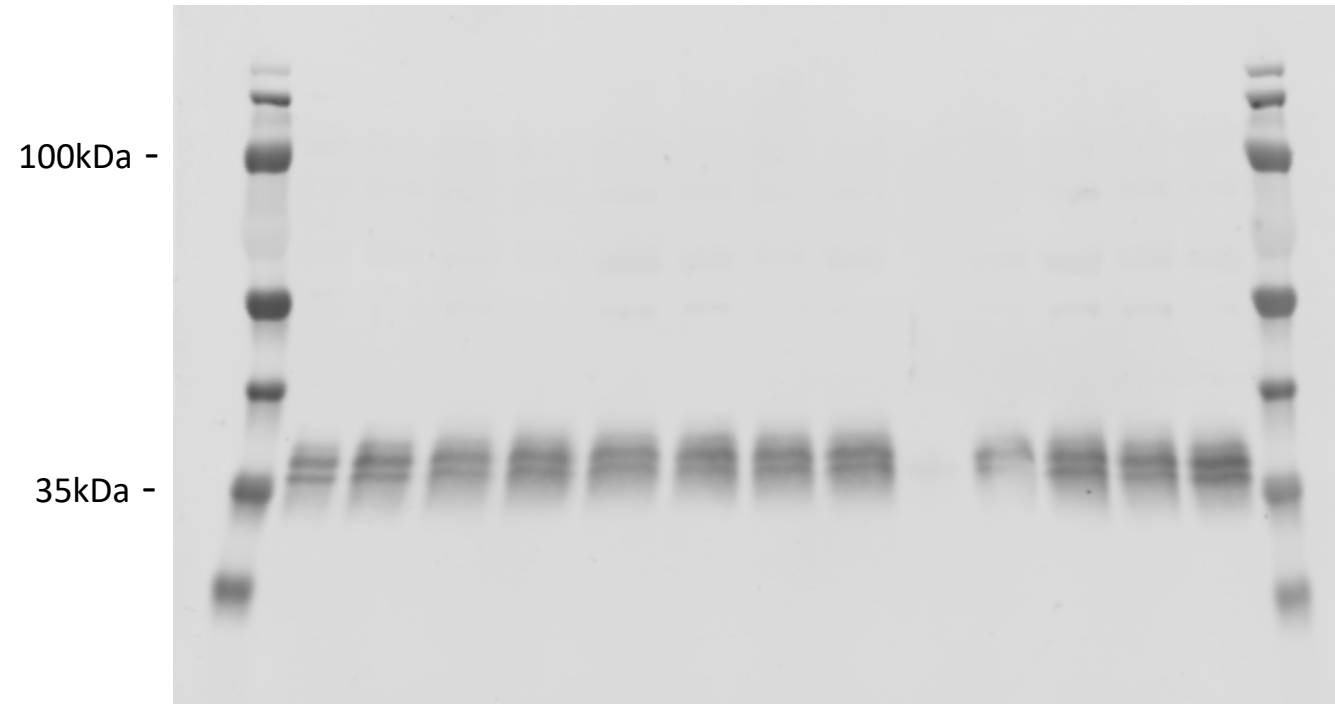

Lanes 3, 4, 12, 13 and 14 used
